# Supplementary material
Source: Springer Nature journal article supplement (https://www.springermedizin.de/resource/supplementary/12889_2012_6161_MOESM2_ESM.pdf/9497872)

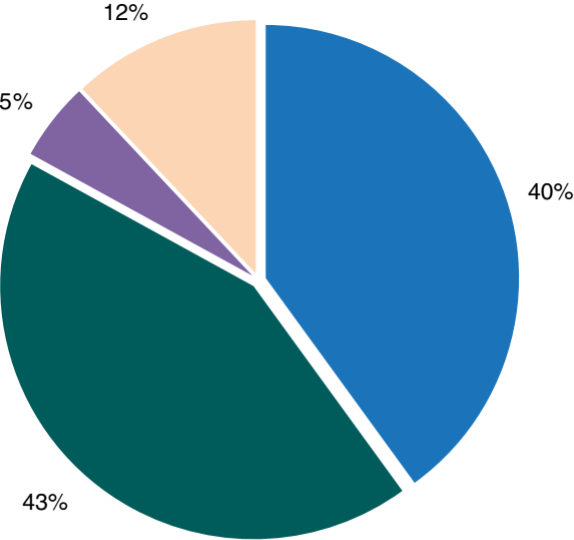

■ CVD ■ COPD ■ Cancer ■ DM

Supplement: MOESM2 [file 9497872]
